# Supplementary material
Source: PubMed Central journal article supplement (PMC3192987)
Supplement: NIHMS313712-supplement-1.pdf [file NIHMS313712-supplement-1.pdf]

## SUPPLEMENTAL MATERIAL

**Supplemental Table 1:** Genetic Polymorphisms Evaluated in the Discovery Cohort

| Gene ( <i>Symbol</i> )                                      | Nucleotide Substitution | SNPId*     | Minor Allele Frequency |
|-------------------------------------------------------------|-------------------------|------------|------------------------|
| Angiotensin Converting Enzyme ( <i>ACE</i> )                | 2350G>A                 | rs4344     | 0.443                  |
|                                                             | -240A>T                 | rs4291     | 0.364                  |
| β1 adrenergic receptor ( <i>ADRB1</i> )                     | 1165C>G                 | rs1801253  | 0.246                  |
|                                                             | 145A>G                  | rs1801252  | 0.121                  |
| β2 adrenergic receptor ( <i>ADRB2</i> )                     | -47T>C                  | rs1042711  | 0.396                  |
|                                                             | 46G>A                   | rs1042713  | 0.368                  |
|                                                             | 79C>G                   | rs1042714  | 0.314                  |
| β3 adrenergic receptor ( <i>ADRB3</i> )                     | 387T>C                  | rs4994     | 0.092                  |
| Angiotensin ( <i>AGT</i> )                                  | 842T>C                  | rs699      | 0.466                  |
|                                                             | -6G>A                   | rs5051     | 0.464                  |
|                                                             | 659C>T                  | rs4762     | 0.103                  |
| Angiotensin receptor ( <i>AGTR1</i> )                       | 1166A>C                 | rs5186     | 0.260                  |
| Apolipoprotein E ( <i>APOE</i> )                            | 448T>C                  | rs429358   | 0.134                  |
|                                                             | 586C>T                  | rs7412     | 0.085                  |
|                                                             | -219G>T                 | rs405509   | 0.450                  |
| Bactericidal/permeability-increasing protein ( <i>BPI</i> ) | 270C>T                  | rs1341023  | 0.477                  |
| Catalase ( <i>CAT</i> )                                     | -21T>A                  | rs17880664 | 0.349                  |
|                                                             | -262G>A                 | rs1001179  | 0.204                  |
|                                                             | -844T>C                 | rs769214   | 0.348                  |
| CD14 Antigen ( <i>CD14</i> )                                | -260G>A                 | rs2569190  | 0.476                  |
| C reactive protein ( <i>CRP</i> )                           | 3'FI C>T                | rs1205     | 0.314                  |
|                                                             | 1059G>C                 | rs1800947  | 0.061                  |
| Cathepsin G ( <i>CTSG</i> )                                 | 2108A>G                 | rs45567233 | 0.066                  |
| E-selectin ( <i>ELAM1</i> )                                 | 98G>T                   | rs1805193  | 0.084                  |
|                                                             | 561A>C                  | rs5361     | 0.089                  |
| Tissue factor ( <i>F3</i> )                                 | -603A>G                 | rs1361600  | 0.493                  |
| Fibrinogen beta chain ( <i>FGB</i> )                        | -455G>A                 | rs1800790  | 0.164                  |
|                                                             | -854G>A                 | rs1800791  | 0.141                  |
|                                                             | -148C>T                 | rs1800787  | 0.176                  |

|                                                      |                                |                                     |                         |
|------------------------------------------------------|--------------------------------|-------------------------------------|-------------------------|
| Fibrinogen gamma chain ( <i>FGG</i> )                | -649A>G                        | rs1800792                           | 0.389                   |
| G-protein $\beta$ 3 subunit ( <i>GNB3</i> )          | 825C>T                         | rs5443<br>rs2243093                 | 0.359                   |
| Glycoprotein Iba ( <i>GP1BA</i> )                    | -5 T>C<br>524C>T               | rs6065                              | 0.138<br>0.106          |
| Glycoprotein VI ( <i>GP6</i> )                       | 13254A>G                       | rs1613662                           | 0.178                   |
| Heat shock protein 70-homologous ( <i>HSPA1L</i> )   | 1478T>C                        | rs2227956                           | 0.161                   |
| Intercellular adhesion molecule-1 ( <i>ICAM1</i> )   | 1462A>G<br>778G>A              | rs5498<br>rs1799969                 | 0.401<br>0.100          |
| Interleukin 1 $\alpha$ ( <i>IL1A</i> )               | -889 C>T<br>4844 G>T           | rs1800587<br>rs17561                | 0.323<br>0.282          |
| Interleukin 1 $\beta$ ( <i>IL1B</i> )                | -511 C>T<br>5810G>A<br>5887C>T | rs16944<br>rs1143633<br>rs1143634   | 0.369<br>0.300<br>0.224 |
| Interleukin 1-receptor antagonist ( <i>IL1RN</i> )   | 11100 T>C<br>8006T>C           | rs315952<br>rs419598                | 0.316<br>0.241          |
| Interleukin 6 ( <i>IL6</i> )                         | -174G>C<br>-597G>A<br>-572G>C  | rs1800795<br>rs1800797<br>rs1800796 | 0.411<br>0.393<br>0.056 |
| Interleukin 8 ( <i>IL8</i> )                         | -251T>A                        | rs4073                              | 0.497                   |
| Interleukin 10 ( <i>IL10</i> )                       | -592C>A<br>-819C>T             | rs1800872<br>rs1800871              | 0.255<br>0.252          |
| Glycoprotein Ialla ( <i>ITGA2</i> )                  | -52C>T<br>807C>T               | rs28095<br>rs1126643                | 0.345<br>0.353          |
| Glycoprotein IIIa ( <i>ITGB3</i> )                   | 1565T>C                        | rs5918                              | 0.152                   |
| Lipopolysaccharide-binding protein ( <i>LBP</i> )    | 42711T>C<br>19983T>C           | rs2232618<br>rs2232582              | 0.114<br>0.192          |
| Lipoprotein lipase ( <i>LPL</i> )                    | 1595C>G                        | rs328                               | 0.096                   |
| Matrix metalloproteinase 9 ( <i>MMP9</i> )           | -1562C>T                       | rs3918242                           | 0.127                   |
| Methylenetetrahydrofolate reductase ( <i>MTHFR</i> ) | 677C>T                         | rs1801133                           | 0.276                   |
| Endothelial nitric oxide synthase ( <i>NOS3</i> )    | 894G>T<br>20628G>T<br>-786T>C  | rs1799983<br>rs1799985<br>rs2070744 | 0.324<br>0.315<br>0.369 |

|                                                                       |           |            |       |
|-----------------------------------------------------------------------|-----------|------------|-------|
| Plasminogen Activator Inhibitor-1 ( <i>PAI-1</i> )                    | -844A>G   | rs2227631  | 0.463 |
| Platelet-endothelial cell adhesion molecule-1 ( <i>PECAM1</i> )       | 1688A>G   | rs12953    | 0.387 |
| Paraoxonase 1 ( <i>PON1</i> )                                         | -108G>A   | rs705379   | 0.444 |
|                                                                       | A>T       | rs854560   | 0.369 |
|                                                                       | -825C>T   | rs854571   | 0.328 |
|                                                                       | -162C>T   | rs705381   | 0.265 |
|                                                                       | 584 A>G   | rs662      | 0.337 |
| Paraoxonase 2 ( <i>PON2</i> )                                         | 964C>G    | rs7493     | 0.213 |
| Peroxisome proliferator-activated receptor $\alpha$ ( <i>PPARA</i> )  | 2498G>C   | rs4253778  | 0.179 |
| Peroxisome proliferator-activated receptor $\gamma$ ( <i>PPARG</i> )  | Ex4-49C>G | rs1801282  | 0.093 |
| Sodium channel, voltage-gated, type V, alpha subunit ( <i>SCN5A</i> ) | 1673A>G   | rs1805124  | 0.260 |
| P-selectin ( <i>SELP</i> )                                            | -1969G>A  | rs1800805  | 0.377 |
|                                                                       | 1902A>G   | rs6127     | 0.372 |
|                                                                       | 2013G>T   | rs6133     | 0.150 |
|                                                                       | 2361A>C   | rs6136     | 0.094 |
|                                                                       | 1087G>A   | rs6131     | 0.169 |
| Tissue factor pathway inhibitor ( <i>TFPI</i> )                       | -399C>T   | rs10153820 | 0.122 |
| Transforming growth factor $\beta$ 1 ( <i>TGFB1</i> )                 | 869T>C    | rs1800470  | 0.336 |
|                                                                       | 915G>C    | rs1800471  | 0.079 |
|                                                                       | -800G>A   | rs1800468  | 0.074 |
|                                                                       | -509C>T   | rs1800469  | 0.290 |
| Thrombomodulin ( <i>THBD</i> )                                        | 1959C>T   | rs1042579  | 0.173 |
| Toll-like receptor 4 ( <i>TLR4</i> )                                  | 1196C>T   | rs4986791  | 0.065 |
|                                                                       | 896A>G    | rs4986790  | 0.055 |
| Tumor necrosis factor $\alpha$ ( <i>TNFA</i> )                        | -308G>A   | rs1800629  | 0.161 |
|                                                                       | +488G>A   | rs1800610  | 0.068 |
|                                                                       | -238G>A   | rs361525   | 0.054 |
| Vascular cell adhesion molecule-1 ( <i>VCAM1</i> )                    | -1594T>C  | rs1800821  | 0.068 |
| Vesicular Monoamine Transporter 2 ( <i>VMAT2</i> )                    | 813+15T>C | rs2072362  | 0.101 |

\* Based on Entrez SNP (<http://www.ncbi.nlm.nih.gov/entrez/>)

**Supplemental Table 2: Genetic Polymorphisms Evaluated in the Validation Cohort**

| Gene ( <i>Symbol</i> )         | SNPId     | Location       | Position |
|--------------------------------|-----------|----------------|----------|
| Thrombomodulin ( <i>THBD</i> ) | rs3176123 | 3'UTR          | 1143     |
|                                | rs2007363 | Flanking_3'UTR | -975     |
|                                | rs6048519 | Flanking_5'UTR | -3973    |
|                                | rs2424505 | Flanking_5'UTR | -5748    |
|                                | rs1318041 | Flanking_5'UTR | -11065   |
|                                | rs6048526 | Flanking_5'UTR | -14057   |

\*Based on Entrez SNP (<http://www.ncbi.nlm.nih.gov/entrez/>). UTR, untranslated region.

**Supplemental Table 3: MALDI-TOF Genotyping Assay Primers**

| SNPid*     | P2                                 | P1                                 | UEP                      |
|------------|------------------------------------|------------------------------------|--------------------------|
| rs4344     | ACGTTGGATGACAATGTTGTG<br>ATGGGTGCC | ACGTTGGATGATCTATGTCGGGCAA<br>GTCAC | CAAGATTATTAACCTTCTTCCCC  |
| rs4291     | ACGTTGGATGGCAGAGGAAG<br>CTGGAGAAAG | ACGTTGGATGTCGGGTGTTCCGGC<br>AAACTG | CTGGAGAAAGGGCCTCCTCTCTTT |
| rs1801253  | ACGTTGGATGATCATCTACTG<br>CCGCAGCCC | ACGTTGGATGTCTCCGTGGGTCGC<br>GTGGC  | CGACTTCCGCAAGGCCTTCCAG   |
| rs1801252  | ACGTTGGATGCTGTTGCTGC<br>CTCCCGCC   | ACGTTGGATGATGAGCGCCATCAG<br>CAGACC | CTGCCTCCCGCCAGCGAA       |
| rs1042711  | ACGTTGGATGAATGAGGCTTC<br>CAGGCCGTC | ACGTTGGATGTCTGGCAGGTAAGC<br>GCACTG | CCCGCCGTGGGTCCGCC        |
| rs1042713  | ACGTTGGATGAACGGCAGCG<br>CCTTCTTGCT | ACGTTGGATGCACACCTCGTCCCTT<br>TGCTG | CGCCTTCTTGCTGGCACCCAAT   |
| rs1042714  | ACGTTGGATGAGACATGACGA<br>TGCCCATGC | ACGTTGGATGTTGCTGGCACCCAAT<br>GGAAG | ACCCACACCTCGTCCCTTT      |
| rs4994     | ACGTTGGATGGAGGCAACCTG<br>CTGGTCATC | ACGTTGGATGGCGAAGTCACGAAC<br>ACGTTG | CTGGTCATCGTGGCCATCGCC    |
| rs699      | ACGTTGGATGTGTGACAGGAT<br>GGAAGACTG | ACGTTGGATGGTGGACGTAGGTGT<br>TGAAG  | AAGACTGGCTGCTCCCTGA      |
| rs5051     | ACGTTGGATGTACCTTCTGCT<br>GTAGTACCC | ACGTTGGATGCCCTCAGCTATAAA<br>TAGGG  | AACAACGGCAGCTTCTTCCCC    |
| rs4762     | ACGTTGGATGACAAACGGCTG<br>CTTCAGGTG | ACGTTGGATGTGTACAGGGCCTGC<br>TAGTGG | CTGTGAACACGCCACCACC      |
| rs5186     | ACGTTGGATGATTCTCTGCA<br>GCACTTCA   | ACGTTGGATGCGGTTCACTCCACAT<br>AATGC | GCACTTCACTACCAATGAGC     |
| rs429358   | ACGTTGGATGTGTCCAAGGAG<br>CTGCAGGC  | ACGTTGGATGTCGGTCTCTGGCC<br>GAGCAT  | GCGGACATGGAGGACGTG       |
| rs405509   | ACGTTGGATGACATTCCTT<br>CCACGCTTG   | ACGTTGGATGTAGAGGTCTTTGAC<br>CACCC  | GAATGGAGGAGGGTGTCTG      |
| rs1341023  | ACGTTGGATGGGAGGATGAGA<br>GAGAACATG | ACGTTGGATGTATGGCGACCAGCA<br>CCATCA | TTGCAACGCGCCGAGATGGG     |
| rs17880664 | ACGTTGGATGACCCTCAGCAG<br>GCAAATCTG | ACGTTGGATGCTGATTGGCTGAGC<br>CTGAAG | ATCTGCCTGTTGCCCGAG       |
| rs1001179  | ACGTTGGATGAGGATGCTGAT<br>AACCAGGAG | ACGTTGGATGTCTGGCCAGCAATT<br>GGAGAG | CGCCCTGGGTTCCGGCTAT      |
| rs2569190  | ACGTTGGATGGAGACACAGAA<br>CCCTAGATG | ACGTTGGATGGCAATGAAGGATGTT<br>TCAGG | GCAGAATCCTTCTGTTACGG     |
| rs1205     | ACGTTGGATGGCCATCTTGTT<br>TGCCACATG | ACGTTGGATGGTTTGCAATCCCTT<br>GGCTC  | TTGTTTGCCACATGGAGAGAGACT |
| rs1800947  | ACGTTGGATGGAAATGTGAAC<br>ATGTGGGAC | ACGTTGGATGAGGACATTAGGACT<br>GAAGGG | TGTGAACATGTGGACTTTGTGCT  |
| rs1805193  | ACGTTGGATGCTGCTTCCCAA<br>AACGGAAAG | ACGTTGGATGGCTGAGAGAACTG<br>TGAAGC  | TATTTCAAGCCTAAACCTTTGGGT |
| rs5361     | ACGTTGGATGGTCTCCTCAT<br>CATGCTTTG  | ACGTTGGATGTGGTCTCTACACATT<br>CACCG | GCCTGTACCAATACATCCTGC    |
| rs1361600  | ACGTTGGATGTCTTACCCC<br>ACGAAGGTC   | ACGTTGGATGATCCCACCGCCTTT<br>CTCCTG | CTACCCACGAAGGTCAAGAATAC  |
| rs1800790  | ACGTTGGATGGCTTATGTTTT<br>TGACAATG  | ACGTTGGATGTATAGAATAGGGTA<br>TGAAT  | CATAATTCTATTTCAAAGGGGC   |
| rs1800791  | ACGTTGGATGCTCACAGACTA<br>AATGAGGCC | ACGTTGGATGCACACAAGTGAACA<br>GACAAG | GAGGCCATTTTCTTCATTT      |
| rs1800787  | ACGTTGGATGCATTTAAGCAA<br>CATCTTCCC | ACGTTGGATGAACTCCCATCATT<br>TGTCC   | AAGCAACATCTTCCAGCAA      |
| rs1800792  | ACGTTGGATGATGCCACCTT<br>CAGACAAAG  | ACGTTGGATGCCTCTGTGTCAACCA<br>TGTTT | GAGCTCAAAGCTCCCTGAG      |
| rs5443     | ACGTTGGATGTCTCCACGAG<br>AGCATCATC  | ACGTTGGATGTCGTAGCCAGCGAA<br>TAGTAG | ATCATCTGCGGCATCACGTC     |

|           |                                    |                                      |                          |
|-----------|------------------------------------|--------------------------------------|--------------------------|
| rs2243093 | ACGTTGGATGATCCACTCAAG<br>GCTCCCTTG | ACGTTGGATGTTGGCAGCAGGAGC<br>AGCAAG   | GGCTCCCTTGCCACAGG        |
| rs6065    | ACGTTGGATGTGTTGTTAGCC<br>AGACTGAGC | ACGTTGGATGAAGGCAATGAGCTG<br>AAGACC   | TCCAGCTTGGGTGTGGGC       |
| rs1613662 | ACGTTGGATGATTTCCAGGA<br>ACCTCTGTG  | ACGTTGGATGATACGCTGTGCACC<br>AGAATG   | TACCAACAGAACCACCTTCC     |
| rs2227956 | ACGTTGGATGTGTCATTGGTG<br>ATGGTGATC | ACGTTGGATGGCCAAATGGTATTCTC<br>AATGTC | TTCACCTTGCCGGTGTCTTGTCC  |
| rs5498    | ACGTTGGATGGATGACAATCT<br>CATACCGGG | ACGTTGGATGAGGAGCACTCAAGG<br>GGAGGT   | GGAGAGCACATTACGGTCACT    |
| rs1799969 | ACGTTGGATGTTGCCATAGGT<br>GACTGTGGG | ACGTTGGATGTCCTAGAGGTGGAC<br>ACGCAG   | CCGAGACTGGGAACAGCC       |
| rs1800587 | ACGTTGGATGTTGGGAGAAAG<br>GAAGGCATG | ACGTTGGATGTTCTACCACCTGAAC<br>TAGGC   | TTTTTACATATGAGCCTTCAATG  |
| rs17561   | ACGTTGGATGTTTACATTGCT<br>CAGGAAGC  | ACGTTGGATGATCTGCACCTGTGAT<br>CATGG   | GCTCAGGAAGCTAAAAGGTG     |
| rs16944   | ACGTTGGATGATTTTCTCCTCA<br>GAGGCTCC | ACGTTGGATGTGTCTGTATTGAGGG<br>TGTGG   | TGCAATTGACAGAGAGCTCC     |
| rs1143633 | ACGTTGGATGTGACCGTATAT<br>GCTCAGGTG | ACGTTGGATGTAATAACAGAAAGG<br>CAGGCC   | CCTCAAGAAATCAAATTTTGCC   |
| rs1143634 | ACGTTGGATGAGTGATCGTAC<br>AGGTGCATC | ACGTTGGATGGTGTCCACATTTCA<br>GAACC    | GCCTCGTTATCCCATGTGTC     |
| rs315952  | ACGTTGGATGGAACAGAAAGC<br>AGGACAAGC | ACGTTGGATGAGGCGGCAGACTCA<br>AAACTG   | CGCCTTCATCCGCTCAGACAG    |
| rs419598  | ACGTTGGATGTGGGATGTAA<br>CCAGAAGAC  | ACGTTGGATGAATTGACATTTGGTC<br>CTTGC   | CTGAGGAACAACCACTAGTTGC   |
| rs1800795 | ACGTTGGATGAGCCTCAATGA<br>CGACCTAAG | ACGTTGGATGGATTGTGCAATGTGA<br>CGTCC   | TTTCCCCTAGTTGTGTCTTGC    |
| rs1800797 | ACGTTGGATGACGCCCTGAAG<br>TAACTGCAC | ACGTTGGATGTCTTCTGTGTTCTGG<br>CTCTC   | AAGTAACTGCACGAAATTTGAGG  |
| rs1800796 | ACGTTGGATGACGCCCTGAAG<br>TAACTGCAC | ACGTTGGATGTCTTCTGTGTTCTGG<br>CTCTC   | CAGGCAGTCTACAACAGCC      |
| rs1800872 | ACGTTGGATGTCCTCAAAGTT<br>CCCAAGCAG | ACGTTGGATGAAAGGAGCCTGGAA<br>CACATC   | CCAGAGACTGGCTTCTACAG     |
| rs1800871 | ACGTTGGATGTAGTGAGCAA<br>CTGAGGCAC  | ACGTTGGATGATTCTCAGTTGGCAC<br>TGGTG   | GCAAACCTGAGGCACAGAGAT    |
| rs28095   | ACGTTGGATGGATCCGGTGT<br>TGCGGAATC  | ACGTTGGATGAGGAAAAGTTTCTG<br>GGCAG    | CGGAATCAGGAGGGGCGGGC     |
| rs1126643 | ACGTTGGATGTGGCCTATTAG<br>CACCAAAAC | ACGTTGGATGAGACATCCCAATATG<br>GTGGG   | TTACCTTGCATATTGAATTGCTCC |
| rs5918    | ACGTTGGATGCCCTCAGCAGA<br>TTCTCCTTC | ACGTTGGATGTTGCTGGACTTCTCT<br>TTGGG   | TCACAGCGAGGTGAGCCC       |
| rs2232618 | ACGTTGGATGGCTCCTCAACT<br>ATTACATCC | ACGTTGGATGCAGCAGTGTTCACTT<br>TTGAC   | CAACTATTACATCCTTAACACC   |
| rs2232582 | ACGTTGGATGTGAACATCCAC<br>AGCTGTGAG | ACGTTGGATGAGTCGGAGATGCTG<br>AGACTC   | GCGCTGAGGCCTGTCCC        |
| rs328     | ACGTTGGATGCTTTAGCCCAG<br>AATGCTCAC | ACGTTGGATGAAAGGCACCTGCGG<br>TATTTG   | TTAGCCCAGAATGCTCACCAGCCT |
| rs3918242 | ACGTTGGATGAAAAATTTAGC<br>CAGGCGTGG | ACGTTGGATGGTTCAAGCAATTCT<br>CCTGC    | CCAGGCGTGGTGGCGCA        |
| rs1801133 | ACGTTGGATGATGCCTTCACA<br>AAGCGGAAG | ACGTTGGATGCTTGAAGGAGAAGG<br>TGTCTG   | GCTGCGTGATGATAAATCG      |
| rs1799983 | ACGTTGGATGAAACGGTCGCT<br>TCGACGTGC | ACGTTGGATGATCCCTTTGGTGCTC<br>ACGTG   | GCTGCAGGCCCCAGATGA       |
| rs1799985 | ACGTTGGATGAGCGGCTGCAT<br>GACATTGAG | ACGTTGGATGGTCCCTAGATTGTG<br>GACTC    | TGAGAGCAAAGGTGAGGCTG     |
| rs2070744 | ACGTTGGATGAGTTTCCCTAG<br>TCCCCATG  | ACGTTGGATGAGTCAGCAGAGAGA<br>CTAGGG   | CATCAAGCTCTTCCCTGGC      |
| rs2227631 | ACGTTGGATGAAGGAAACAGG<br>AGACCAACG | ACGTTGGATGGAGGATAAAGGACA<br>AGCTGC   | GACCAACGTGTAAGTTTCACTTC  |
| rs854560  | ACGTTGGATGCTTTTCTGGCA<br>GAAACTGGC | ACGTTGGATGGAGCTAATGAAAGC<br>CAGTCC   | TGGCAGAACTGGCTCTGAAGAC   |

|            |                                    |                                     |                          |
|------------|------------------------------------|-------------------------------------|--------------------------|
| rs705381   | ACGTTGGATGAGCTAGCTGGG<br>CCGACCAG  | ACGTTGGATGAAAGTGCTGAGCTC<br>CTGCCG  | ACCAGGTGCACAGAAGGCC      |
| rs662      | ACGTTGGATGACATACGACCA<br>CGCTAAACC | ACGTTGGATGCCTGAGCACTTTTAT<br>GGCAC  | CCCAAATACATCTCCCAGGAT    |
| rs4253778  | ACGTTGGATGTTCTGGAGATC<br>ACAACCACC | ACGTTGGATGGGTGGAACACTTGA<br>AGCTTG  | TGGGAAATGAAGCTTTTGAATC   |
| rs1805124  | ACGTTGGATGGGGCCAGGGC<br>ACCAGCAGT  | ACGTTGGATGACAGCGGGGAGAG<br>CGAGA    | GGGCACCAGCAGTGATGTG      |
| rs1800805  | ACGTTGGATGGCCTCCATGTC<br>TTTCTGTT  | ACGTTGGATGTCTTCATCCCCATCT<br>GAGAC  | GTTCTTACTTTCACTCACCAGC   |
| rs6127     | ACGTTGGATGTTCAATGTTGG<br>CTCCACCTG | ACGTTGGATGGCATTCCACATTATT<br>GGGCC  | GCTCCACCTGTCATTTCTCTTGT  |
| rs6133     | ACGTTGGATGTACAGTACATG<br>GTTCCCTGC | ACGTTGGATGACAGGCATAGCATC<br>ACTTCC  | GGTGAGGGCTGGACATTGCA     |
| rs6136     | ACGTTGGATGATGCCAAGAGA<br>ATGGCCAC  | ACGTTGGATGCCTGCTTGGCAGGT<br>TGCCA   | AAGAGAATGGCCACTGGTCA     |
| rs6131     | ACGTTGGATGGCAAAGCAGT<br>GAGCGGATG  | ACGTTGGATGTCTCCAGCTGTGCA<br>GTGTCAG | TGAACACAGTCCATGGTTCCTTCA |
| rs10153820 | ACGTTGGATGTAAAAGTCTGA<br>GGGCTACCG | ACGTTGGATGAAGCCTGACACCTG<br>CAATAG  | CCGTTGGAGGTCTCTCTTAGTGA  |
| rs1800471  | ACGTTGGATGTGCTGTGGCTA<br>CTGGTGCTG | ACGTTGGATGCACCAGCTCCATGT<br>CGATAG  | GGTGCTGACGCCTGGCC        |
| rs1800468  | ACGTTGGATGTTGACCACTGT<br>GCCATCCTC | ACGTTGGATGTGGAGTGCTGAGGG<br>ACTCTG  | GTCCGGGGTGTGGATGGTGGTGA  |
| rs1800469  | ACGTTGGATGTCTTACAGGTG<br>TCTGCCTCC | ACGTTGGATGAGGGTGTCAAGTGGG<br>AGGAG  | GCCTCCTGACCCTTCCATCC     |
| rs1042579  | ACGTTGGATGAGTCACAGTGC<br>GTGCCAATG | ACGTTGGATGGGTACCTTCGAGTG<br>CATCTG  | CACAGTCGGTGCCAATGTGGCGG  |
| rs4986791  | ACGTTGGATGACACCATTGAA<br>GCTCAGATC | ACGTTGGATGGCTTGAGTTTCAAAG<br>GTTGC  | CAGATCTAAATACTTTAGGCTG   |
| rs4986790  | ACGTTGGATGTAGAGGGCCTG<br>TGCAATTTG | ACGTTGGATGCACACTCACCAGGG<br>AAAATG  | CATACTTAGACTACTACCTCGATG |
| rs1800629  | ACGTTGGATGGATTTGTGTGT<br>AGGACCCTG | ACGTTGGATGGGTCCCCAAAAGAA<br>ATGGAG  | ACCCTGGAGGCTGAACCCCGTCC  |
| rs1800610  | ACGTTGGATGGAAAGATGTGC<br>GCTGATAGG | ACGTTGGATGCTTCCACATCTCTT<br>TCTGC   | GGGAGGGATGGAGAGAAAAAAC   |
| rs361525   | ACGTTGGATGACACAAATCAG<br>TCAGTGGCC | ACGTTGGATGATCAAGGATACCCCT<br>CACAC  | GAAGACCCCTCGGAATC        |
| rs2072362  | ACGTTGGATGACGTCATGGGA<br>ATCGCCTTG | ACGTTGGATGAGGCCCTCTTGCC<br>AGTTTG   | CTTAGGTGGTAAGGCCCC       |

**Supplemental Table 4: Definition of Variables in the EuroSCORE Risk Model**

| Risk factor                        | STS definition match                                                                                                                                                                                                                                                                                                                                                                                                                                                                                                                                                                                                                  |
|------------------------------------|---------------------------------------------------------------------------------------------------------------------------------------------------------------------------------------------------------------------------------------------------------------------------------------------------------------------------------------------------------------------------------------------------------------------------------------------------------------------------------------------------------------------------------------------------------------------------------------------------------------------------------------|
| 1 Age                              | Per 5 years or part thereof over 60 years                                                                                                                                                                                                                                                                                                                                                                                                                                                                                                                                                                                             |
| 2 Sex                              | Female                                                                                                                                                                                                                                                                                                                                                                                                                                                                                                                                                                                                                                |
| 3 Chronic pulmonary disease        | Patient required pharmacologic therapy for the treatment of chronic pulmonary compromise, or patient has a FEV1 <75% of predicted value                                                                                                                                                                                                                                                                                                                                                                                                                                                                                               |
| 4 Extracardiac arteriopathy        | Patient has peripheral vascular disease as indicated by claudication either with exertion or rest; amputation for arterial insufficiency; aorto-iliac occlusive disease reconstruction; peripheral vascular bypass surgery, angioplasty or stent; documented AAA, AAA repair, or stent; positive non-invasive testing documented – or – Patient has cerebrovascular disease, documented by any one of the following: Unresponsive coma >24 h; CVA (symptoms >72 h after onset); RIND (recovery within 72 h); TIA (recovery within 24 h); or non- invasive carotid test with >75% occlusion                                            |
| 5 Neurological dysfunction disease | A central neurologic deficit persisting more than 24 h                                                                                                                                                                                                                                                                                                                                                                                                                                                                                                                                                                                |
| 6 Previous cardiac surgery         | Prior cardiac surgical operation(s) with or without the use of cardiopulmonary bypass                                                                                                                                                                                                                                                                                                                                                                                                                                                                                                                                                 |
| 7 Serum creatinine                 | >200 mmol/l preoperatively                                                                                                                                                                                                                                                                                                                                                                                                                                                                                                                                                                                                            |
| 8 Active endocarditis              | Patient currently under antibiotic treatment for endocarditis at the time of surgery                                                                                                                                                                                                                                                                                                                                                                                                                                                                                                                                                  |
| 9 Critical preoperative state      | Any one or more of the following: sustained ventricular tachycardia or ventricular fibrillation requiring cardioversion and/or IV amiodarone, preoperative inotropic support, preoperative intra-aortic balloon pump, or patient required cardiopulmonary resuscitation within 1 h before the start of the operative procedure                                                                                                                                                                                                                                                                                                        |
| 10 Unstable angina                 | Preoperative use of iv nitrates                                                                                                                                                                                                                                                                                                                                                                                                                                                                                                                                                                                                       |
| 11 LV dysfunction                  | LVEF 30–50%; LVEF <30%                                                                                                                                                                                                                                                                                                                                                                                                                                                                                                                                                                                                                |
| 12 Recent myocardial infarction    | <21 days                                                                                                                                                                                                                                                                                                                                                                                                                                                                                                                                                                                                                              |
| 13 Pulmonary hypertension          | Systolic PA pressure >30 mmHg                                                                                                                                                                                                                                                                                                                                                                                                                                                                                                                                                                                                         |
| 14 Emergency                       | Procedure status is emergent or salvage. <i>Emergent</i> : The patient's clinical status includes any of the following. a. Ischaemic dysfunction (any of the following): (1) ongoing ischaemia including rest angina despite maximal medical therapy (medical and/or IABP); (2) acute evolving myocardial infarction within 24 h before surgery; or (3) pulmonary oedema requiring intubation. b. Mechanical dysfunction (either of the following): (1) shock with circulatory support; or (2) shock without circulatory support. <i>Salvage</i> : The patient is undergoing CPR en route to the OR or prior to anaesthesia induction |
| 15 Other than isolated CABG        | Any valve procedure in addition to or separate from CABG                                                                                                                                                                                                                                                                                                                                                                                                                                                                                                                                                                              |
| 16 Surgery on thoracic aorta       | Aortic aneurysm/dissection repair                                                                                                                                                                                                                                                                                                                                                                                                                                                                                                                                                                                                     |
| 17 Post-infarct septal rupture     | Ventricular septal defect                                                                                                                                                                                                                                                                                                                                                                                                                                                                                                                                                                                                             |



**Supplemental Table 5:** Baseline Demographic, Clinical and Procedural Characteristics in the Combined Cohort

| Characteristics                                                     | Survived<br>(n=1664) | Died<br>(n=282) | P*       |
|---------------------------------------------------------------------|----------------------|-----------------|----------|
| <b>Demographics</b>                                                 |                      |                 |          |
| Age (years)                                                         | 62 (11)              | 67.3 (10)       | < 0.001  |
| Gender (% female)                                                   | 26                   | 38              | <0.001   |
| <b>Medical history</b>                                              |                      |                 |          |
| Diabetes (%)                                                        | 31                   | 48              | <0.001   |
| Peripheral vascular disease (%)                                     | 13                   | 24              | < 0.001  |
| Preoperative LVEF (%)                                               | 53.5 (13.9)          | 48.4 (16.0)     | < 0.001  |
| <b>Procedural factors</b>                                           |                      |                 |          |
| CPB duration (min)                                                  | 112 (47)             | 130 (58)        | < 0.001  |
| Aortic cross-clamp duration (min)                                   | 63 (31)              | 70 (36)         | < 0.001  |
| Number of grafts                                                    | 2.9 (1.1)            | 2.9 (0.9)       | 0.96     |
| Intraoperative aprotinin (%)                                        | 6                    | 13              | <0.001   |
| IMA use (%)                                                         | 95                   | 92              | 0.07     |
| Logistic EuroSCORE                                                  | 3.2 [1.8-6.1]        | 6.3 [2.9-14.7]  | < 0.001  |
| <b>Medications at hospital discharge</b>                            |                      |                 |          |
| Aspirin (%)                                                         | 92                   | 92              | 0.75     |
| Beta-blocker (%)                                                    | 87                   | 75              | <0.001   |
| Statin (%)                                                          | 48                   | 41              | 0.037    |
| <i>THBD</i> rs1045279 or rs3176123,<br>2 copies of minor allele (%) | 4                    | 10              | < 0.001# |

Values expressed as mean (SD), median [interquartile range], or as %. \*Wilcoxon rank-sum (continuous variables); Pearson  $\chi^2$  (categorical variables). #Probability value refers to a univariate comparison of two copies of the minor (risk) allele to one or no copies of risk allele (recessive model). LVEF, left ventricular ejection fraction; CPB, cardiopulmonary bypass; IMA, internal mammary artery.

**Supplemental Table 6:** Multivariable Models of 5-year All-Cause Mortality Using Clinical, Procedural and Genotypic Information in the Combined Cohort

| Model variables                                                             | HR (95% CI)      | Predictor P | Model P | Model AIC         | Model BIC         | Model -2LL        | C-statistic        |
|-----------------------------------------------------------------------------|------------------|-------------|---------|-------------------|-------------------|-------------------|--------------------|
| Logistic EuroSCORE                                                          | 2.07 (1.73-2.48) | <0.001      |         |                   |                   |                   |                    |
| Diabetes                                                                    | 1.87 (1.44-2.44) | <0.001      |         |                   |                   |                   |                    |
| CPB duration (min)                                                          | 1.13 (1.02-1.26) | 0.02        |         |                   |                   |                   |                    |
| Number of grafts                                                            | 0.98 (0.76-1.26) | 0.85        |         |                   |                   |                   |                    |
| Discharge beta-blocker                                                      | 0.61 (0.45-0.83) | 0.001       |         |                   |                   |                   |                    |
| Discharge statin                                                            | 0.71 (0.54-0.94) | 0.01        | <0.0001 | 1126 <sup>a</sup> | 1162 <sup>a</sup> | 1111 <sup>a</sup> | 0.725 <sup>a</sup> |
| <i>rs1042579</i> or <i>rs3176123</i> recessive (two copies of minor allele) | 2.43 (1.57-3.74) | <0.001      | <0.0001 | 1110 <sup>b</sup> | 1151 <sup>b</sup> | 1093 <sup>b</sup> | 0.74 <sup>b</sup>  |

The predictive values of adding the THBD SNP *rs1045279* or *rs3176123* recessive genotypes (2 copies of the minor allele) to the baseline clinical model of all-cause mortality are shown for the combined cohort. P values expressed using Wald test; HR, hazard ratio; CI, confidence interval; CPB, cardiopulmonary bypass; AIC, Akaike information criterion; BIC, Bayes information criterion; -2LL, negative two log likelihood ratio; a, values based on clinical multivariable model only; b, values based on combined clinico-genetic model.

# Supplemental Figure 1: Linkage Disequilibrium Pattern in Thrombomodulin (THBD) Gene

**Gene Name: THBD**

**Gene ID: 7056**

**Chromosome 20: 22974270 - 22978301 (-)**

**Allele Frequency Cutoff (%): 0 , monomorphic sites excluded**

**Data Merging: common samples with combined variations**

**Population: PGA-EUROPEAN-PANEL, Submitter: PGA-UW-FHCRC**

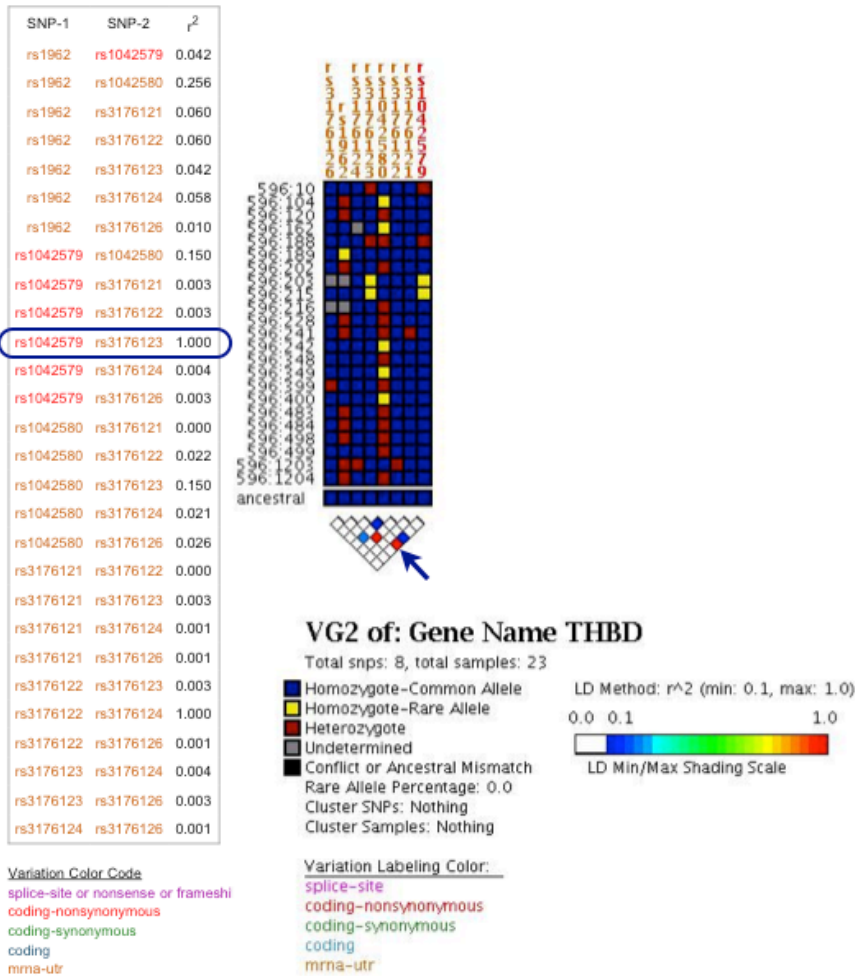

Source: Seattle SNPs Variation Discovery Resource, Genome Variation Server (<http://gvs.gs.washington.edu/GVS/>), accessed on November, 10 2009.

| SNP       | Proxy     | Distance | r <sup>2</sup> | D' | Chromosome | Coordinate_HG18 | GeneVariant | GeneName | Major | Minor | MAF   | NObserved |
|-----------|-----------|----------|----------------|----|------------|-----------------|-------------|----------|-------|-------|-------|-----------|
| rs1042579 | rs3176123 | 1311     | 1              | 1  | chr20      | 22975413        | 3PRIME_UTR  | THBD     | T     | G     | 0.133 | 120       |

Source: SNAP SNP Annotation and Proxy Search v.2.2 (<http://www.broadinstitute.org/mpg/snap/>), Broad Institute.

**Supplemental Figure 2.** Distribution of rs1042579 and rs3176123 genotypes in a cohort of N=421 patients who were jointly typed at both loci. Pairwise linkage disequilibrium estimates are  $D'=0.98$ ,  $r^2=0.97$ .

| overlap\$RS1042579 | overlap\$RS3176123 |              |             | Row Total |
|--------------------|--------------------|--------------|-------------|-----------|
|                    | A/A                | A/C          | C/C         |           |
| C/C                | 263<br>0.625       | 3<br>0.007   | 0<br>0.000  | 266       |
| C/T                | 3<br>0.007         | 122<br>0.290 | 0<br>0.000  | 125       |
| T/T                | 0<br>0.000         | 3<br>0.007   | 27<br>0.064 | 30        |
| Column Total       | 266                | 128          | 27          | 421       |

**Supplemental Figure 3:** Receiver Operator Characteristic (ROC) curves for the clinico-genetic and clinical covariate models in the combined cohort

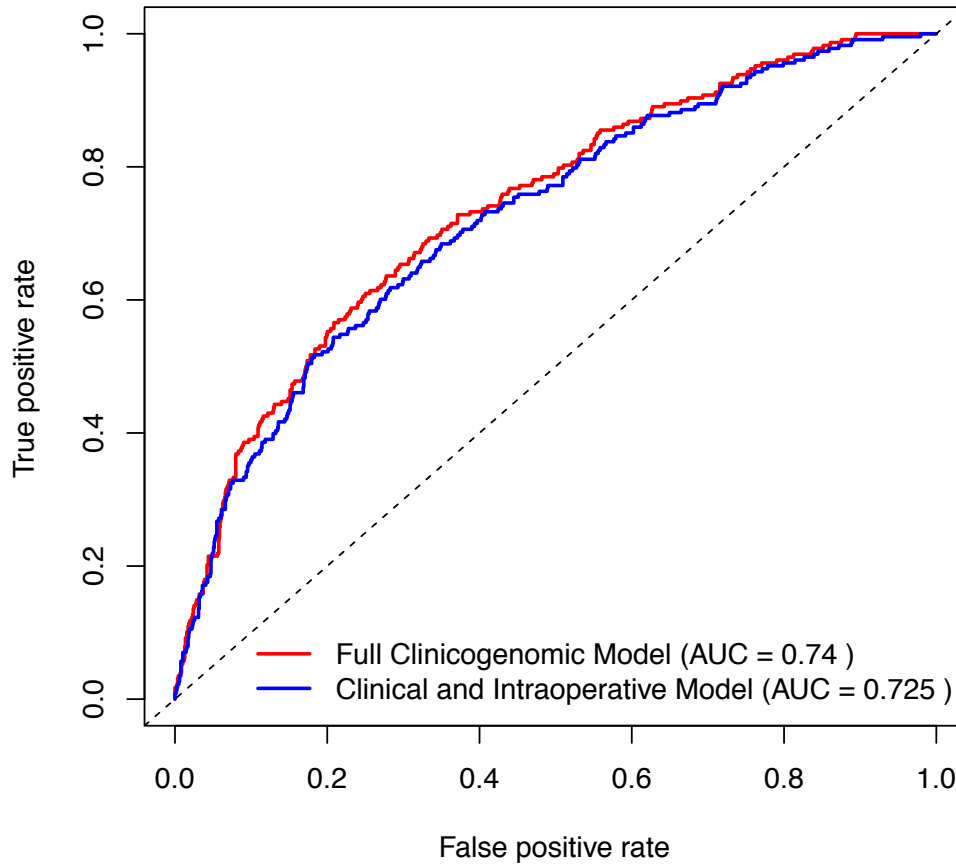

AUC, area under the ROC curve.

## ONLINE APPENDIX

### Perioperative Genetics and Safety Outcomes Study (PEGASUS) Investigative Team Members

Andrew Allen, PhD, Carmelo Milano, MD, Eugene Moretti, MD, Joseph P. Mathew, MD, Madhav Swaminathan, MD, Mark Stafford-Smith, MD, Ian J. Welsby, MD, G. Burkhard Mackensen, MD, PhD, Mark F. Newman, MD, R. Duane Davis, MD, PhD, Bonita Funk, RN, Barbara Phillips-Bute, PhD, Donald Glower, MD, Katherine P. Grichnik, MD, Roger L. Hall, AAS, Michael P. Smith, MS, Elizabeth Hauser, PhD, Peter K. Smith, MD, Steven E. Hill, MD, Robert Jones, MD, Daniel Laskowitz, MD, Andrew Lodge, MD, William D. White, MPH, Willem Lombard, MD, Huntington F. Willard, PhD, Geoffrey S. Ginsburg, MD, PhD, Miklos D. Kertai, MD, PhD, David B. Goldstein, PhD, Jeffrey Gaca, MD, Mihai V. Podgoreanu, MD
